# Supplementary material
Source: Springer Nature journal article supplement (https://www.springermedizin.de/resource/supplementary/12889_2012_5132_MOESM1_ESM.pdf/9493392)
Supplement: MOESM1 [file 9493392]

Complete birth cohort 1989 – 2010

n = 40812

Study cohort 1989 – 2010

n = 33088

Subset 2001 – 2010

n = 15240

Homogeneous subset (2001-2010)

Age 20-37 years and BMI<sup>c</sup> 18.5-24.99, and no assisted reproduction, smoking, diabetes, preeclampsia, moderate/severe chronic somatic or psychiatric disease, substance abuse, episodes or known risk of thromboembolism, prior hypertension, induction of birth or caesarean section. Difference between expected date of delivery based on ultrasound and last menstrual period less than 14 days.

n = 4214

Exclusions:

|                                                |      |
|------------------------------------------------|------|
| Twins:                                         | 1342 |
| Stillbirths/neonatal deaths:                   | 281  |
| Congenital malformations:                      | 586  |
| Missing EDD <sup>a</sup> and GA <sup>b</sup> : | 937  |
| Premature births:                              | 2103 |
| Post-term births:                              | 2475 |
